# Supplementary material for: Fcγ-receptor-IIIA bioactivity of circulating and synovial immune complexes in rheumatoid arthritis
Source: PubMed Central journal article supplement — RMD Open. 2024 Aug 28;10(3):e004190. doi: 10.1136/rmdopen-2024-004190 (PMC11367361; doi:10.1136/rmdopen-2024-004190), 2024-08-28
Supplement: rmdopen-10-3-s001.pdf [file rmdopen-10-3-s001.pdf]

|                                          | RA    | Other joint diseases |
|------------------------------------------|-------|----------------------|
| Number of samples/patients               | 11/11 | 15/13                |
| Female sex                               | 82%   | 54%                  |
| Mean age                                 | 66    | 55                   |
| Percent RF positive (serum)              | 55%   | 7%                   |
| Percent ACPA positive (serum)            | 73%   | 7%                   |
| Patients with erosive course of disease  | 9     | 3                    |
| Patients on corticosteroids              | 6     | 7                    |
| Patients on DMARDs                       | 1     | 7                    |
| Patients on Biologicals                  | 4     | 4                    |
| Patients on JAK inhibitors               | 0     | 0                    |
| Patients on immune checkpoint inhibitors | 0     | 1                    |
| Mean synovial cell number [cells/nl]     | 7,56  | 4,01                 |
| Presence of crystals in SF sample        | 0     | 1                    |
| Presence of bacteria/fungi in SF sample  | 0     | 0                    |

**Suppl. Table 1. Summary of characteristics of the patients whose synovial fluid samples were analyzed.** The table refers to figure 3. Values represent absolute numbers. Abbreviations: DMARDs=disease-modifying anti-rheumatic drugs, JAK=janus kinase, SF=synovial fluid

| <i>CDI6 Activation Index</i> | Age | Gender | RF (IU/ml) | ACPA (IU/ml) | Erosive | Disease activity | Current therapy                                    | Cells /nl synovial fluid |
|------------------------------|-----|--------|------------|--------------|---------|------------------|----------------------------------------------------|--------------------------|
| 11335                        | 78  | female | 100        | 340          | yes     | moderate         | Prednisone 10mg/d                                  | 23,25                    |
| 11296                        | 31  | female | 218        | 1184         | n.d.    | high             | No DMARDs                                          | 10,65                    |
| 8777                         | 45  | female | 69         | 1723         | yes     | High             | Prednisone 10mg/d<br>Abatacept 125mg every 3 weeks | 13,5                     |
| 7815                         | 88  | female | 8,9        | 2769         | yes     | high             | Etanercept 50mg/week                               | <0,2                     |
| 6735                         | 65  | female | 287        | 154,7        | yes     | moderate         | No DMARDs                                          | 5                        |
| 3769                         | 69  | female | 900        | neg.         | yes     | moderate         | Adalimumab                                         | 8,75                     |
| 2163                         | 60  | female | neg.       | 1965         | yes     | moderate         | No DMARDs,                                         | 4,05                     |

|       |    |        |      |      |     |          | Piroxicam                                                  |      |
|-------|----|--------|------|------|-----|----------|------------------------------------------------------------|------|
| 984,8 | 74 | male   | 197  | n.d. | yes | moderate | Prednisone<br>6,5mg/d                                      | 1    |
| 444   | 77 | female | 90   | 159  | yes | moderate | Methotrexate<br>12,5mg<br>s.c./week<br>Prednisone<br>6mg/d | 1,6  |
| 442,8 | 86 | male   | 59,1 | 86   | yes | moderate | Prednisone<br>10mg/d                                       | 1,15 |
| 110   | 50 | female | neg. | neg. | no  | moderate | Prednisone<br>4mg/d<br>Etanercept                          | 14   |

**Suppl. Table 2. Characteristics of the RA patients whose synovial fluid samples were analyzed.**

The table refers to figure 3. Values represent absolute numbers. Abbreviations: DMARDs=disease-modifying anti-rheumatic drugs, JAK=janus kinase, SF=synovial fluid, n.d.= not determined. Of note, 2 patients (36 year-old and 66 year-old females) were punctured twice.

| <i>CD16</i><br><i>Activation</i><br><i>Index</i> | Age | Gender | Diagnosis                                                                                                                  | Erosive | Disease<br>activity                    | Current therapy                                            | Cells<br>/nl<br>synovia<br>l fluid |
|--------------------------------------------------|-----|--------|----------------------------------------------------------------------------------------------------------------------------|---------|----------------------------------------|------------------------------------------------------------|------------------------------------|
| 3299                                             | 36  | female | Juvenile<br>idiopathic arthritis<br>HLA-B27+<br>ANA+                                                                       | nd      | moderate                               | Adalimumab<br>Sulfasalazine<br>Prednisone                  | 4,5                                |
| 1218                                             | 36  | female | Juvenile<br>idiopathic arthritis<br>HLA-B27+<br>ANA+                                                                       | nd      | moderate                               | Adalimumab<br>Sulfasalazine<br>Prednisone                  | 4,6                                |
| 498,8                                            | 57  | female | Psoriatic arthritis                                                                                                        | no      | moderate                               | Prednisone 8mg/d                                           | 9,05                               |
| 433,8                                            | 55  | male   | Seronegative RA<br>with secondary<br>AA amyloidosis,<br>but current<br>effusion due to<br>episode of gout<br>with abundant | yes     | remissio<br>n of RA,<br>active<br>gout | Tocilizumab 162<br>mg s.c./week<br>Prednisone 15<br>mg/day | 9,9                                |

|       |    |        | crystals in sample                                                                                            |     |          |                                                 |       |
|-------|----|--------|---------------------------------------------------------------------------------------------------------------|-----|----------|-------------------------------------------------|-------|
| 298,5 | 53 | female | Activated Osteoarthritis                                                                                      | no  | moderate | Prednisone                                      | 0,15  |
| 281,8 | 79 | female | RF+ ACPA+ RA, but current effusion due to osteoarthritis with indication for endoprothetic replacement (knee) | yes | moderate | Abatacept                                       | 0,16  |
| 257,7 | 48 | female | HLA-B27+ peripheral Spondylarthritis                                                                          | nd  | moderate | Methotrexate 15mg sc/week                       | 0     |
| 173,4 | 66 | female | 1. Activated Osteoarthritis<br>2. Polymyositis                                                                | nd  | moderate | Azathioprine 125mg/d                            | 0,27  |
| 126,9 | 66 | female | 1. Activated Osteoarthritis<br>2. Polymyositis                                                                | nd  | moderate | Azathioprine 125mg/d                            | 0,29  |
| 115,5 | 73 | male   | Polymyalgia rheumatica                                                                                        | nd  | moderate | Leflunomide 20mg<br>Prednisone 4mg              | 1,25  |
| 79,04 | 56 | male   | Unclear joint swelling                                                                                        | yes | moderate | Prednisone 10mg<br>Anakinra<br>Leflunomide 10mg | 1     |
| 61,37 | 49 | male   | Psoriatic arthritis                                                                                           | nd  | high     | Methotrexate 15mg sc/week                       | 5,8   |
| 40,54 | 60 | male   | Psoriatic arthritis                                                                                           | yes | moderate | No immunosuppressive therapy                    | 0,5   |
| 40,42 | 37 | male   | Chlamydia trachomatis-associated reactive arthritis                                                           | nd  | moderate | Prednisone 40mg/d                               | 3,3   |
| 27,73 | 46 | female | Immune related adverse event arthritis                                                                        | nd  | high     | PD-L1 inhibitor                                 | 16,15 |

**Suppl. Table 3. Characteristics of the non-RA patients whose synovial fluid samples were analyzed.**

The table refers to figure 3. Values represent absolute numbers. Abbreviations: DMARDs=disease-modifying anti-rheumatic drugs, JAK=janus kinase, SF=synovial fluid, nd= not determined. Of note, 2 patients (36 year-old and 66 year-old females) were punctured twice.
